# Supplementary material
Source: PubMed Central journal article supplement (PMC5263113)
Supplement: NIHMS832527-supplement-1.pdf [file NIHMS832527-supplement-1.pdf]

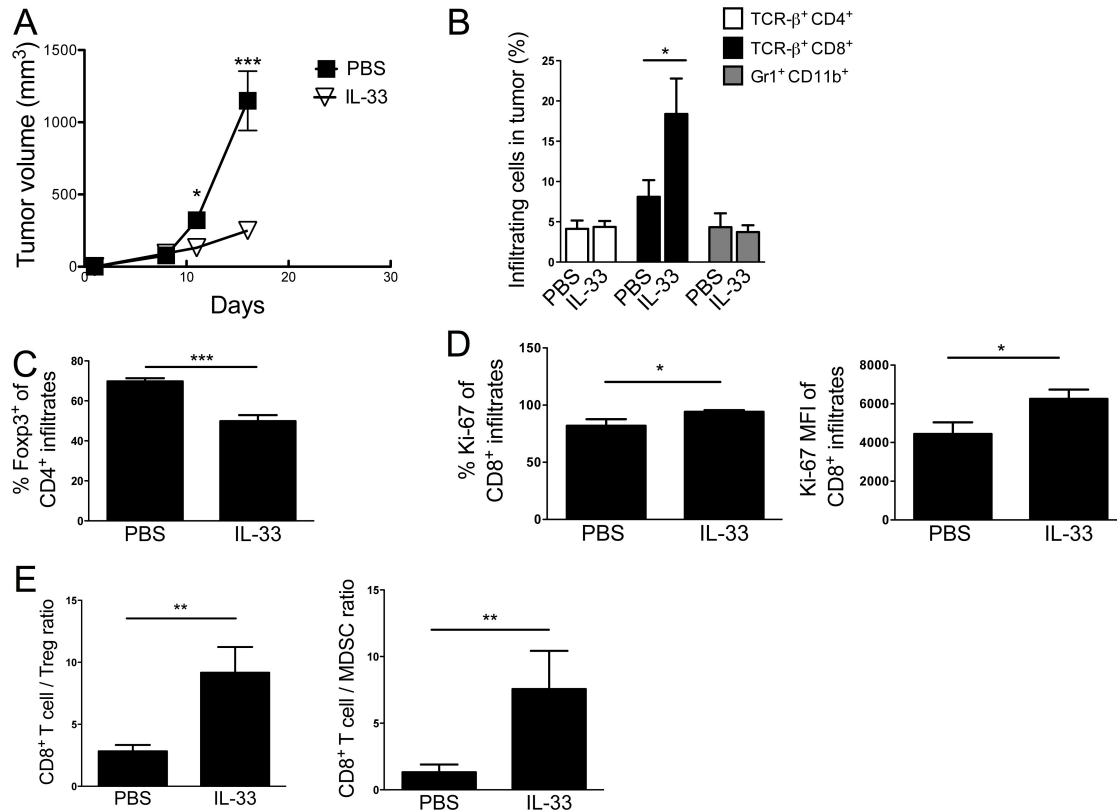

**Supplemental Figure 1. Administration of rIL-33 alone is sufficient to inhibit tumor growth in B16-SIY tumor bearing mice. (A)** C57BL/6 WT mice were challenged s.c. with  $10^6$  B16-SIY tumor cells. On day 8 each group received either PBS or  $1 \mu\text{g}$  IL-33 daily. **(B)** Percent tumor-infiltrating  $\text{CD4}^+\text{TCR}\beta^+$ ,  $\text{CD8}^+\text{TCR}\beta^+$ ,  $\text{Gr1}^+\text{CD11b}^+$  and **(C)**  $\text{CD4}^+\text{Foxp3}^+$  cells from B16-SIY-bearing mice. **(D)** rIL-33-treated mice had increased percentage and MFI of proliferation (Ki-67) of tumor-infiltrating  $\text{CD8}^+$  T cells compared to PBS group. **(E)** IL-33 shifted the ratio of  $\text{CD8}^+$  T cell to suppressive cells in favor of increased proportion of  $\text{CD8}^+$  T cells, as determined by flow cytometry percentages. Cells were collected for flow cytometry 8-10 days after PBS or rIL-33 treatment. Data show mean  $\pm$  SEM ( $n=10$ ). \*,  $p<0.05$ , \*\*,  $p<0.01$ , \*\*\*,  $p<0.001$ .

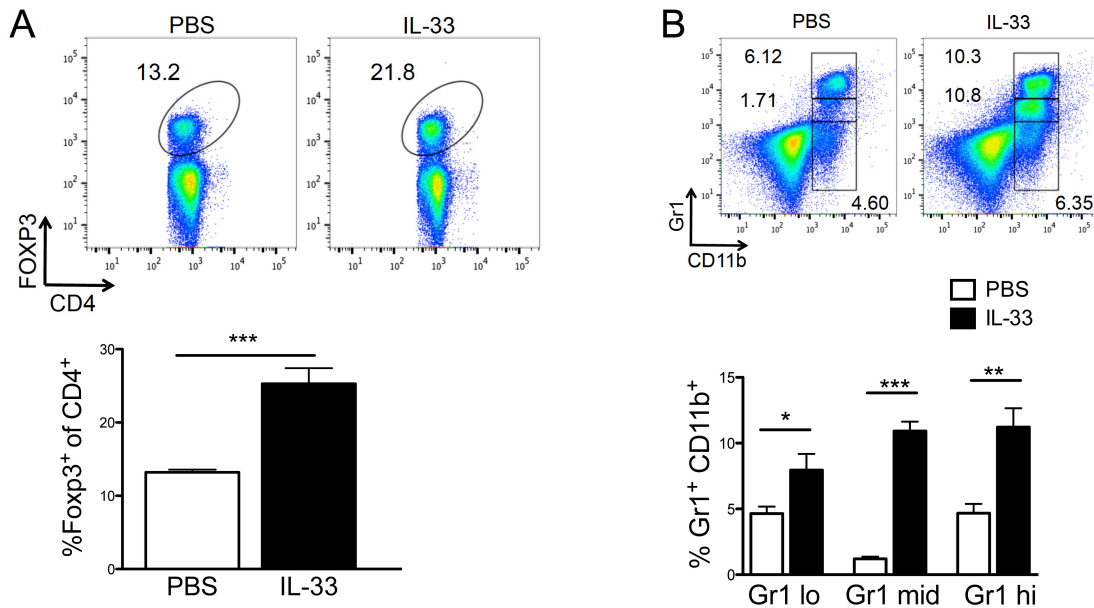

**Supplemental Figure 2. rIL-33 treatment increases suppressive cell populations in the spleen of tumor bearing mice. (A)** Representative dot plots of Foxp3 expression in splenic CD4<sup>+</sup> cells collected 8-10 days post rIL-33 or PBS treatment. Percent Foxp3<sup>+</sup> cells is indicated within plots and summarized (n=10). **(B)** Representative flow cytometric analysis of splenic Gr1<sup>+</sup>CD11b<sup>+</sup> cells collected 8-10 days post rIL-33 or PBS treatment. Percent Gr1<sup>+</sup>CD11b<sup>+</sup> cells is indicated within plots and summarized (n=10). Data show mean ± SEM. \*, p<0.05, \*\*, p<0.01, \*\*\*, p<0.001.

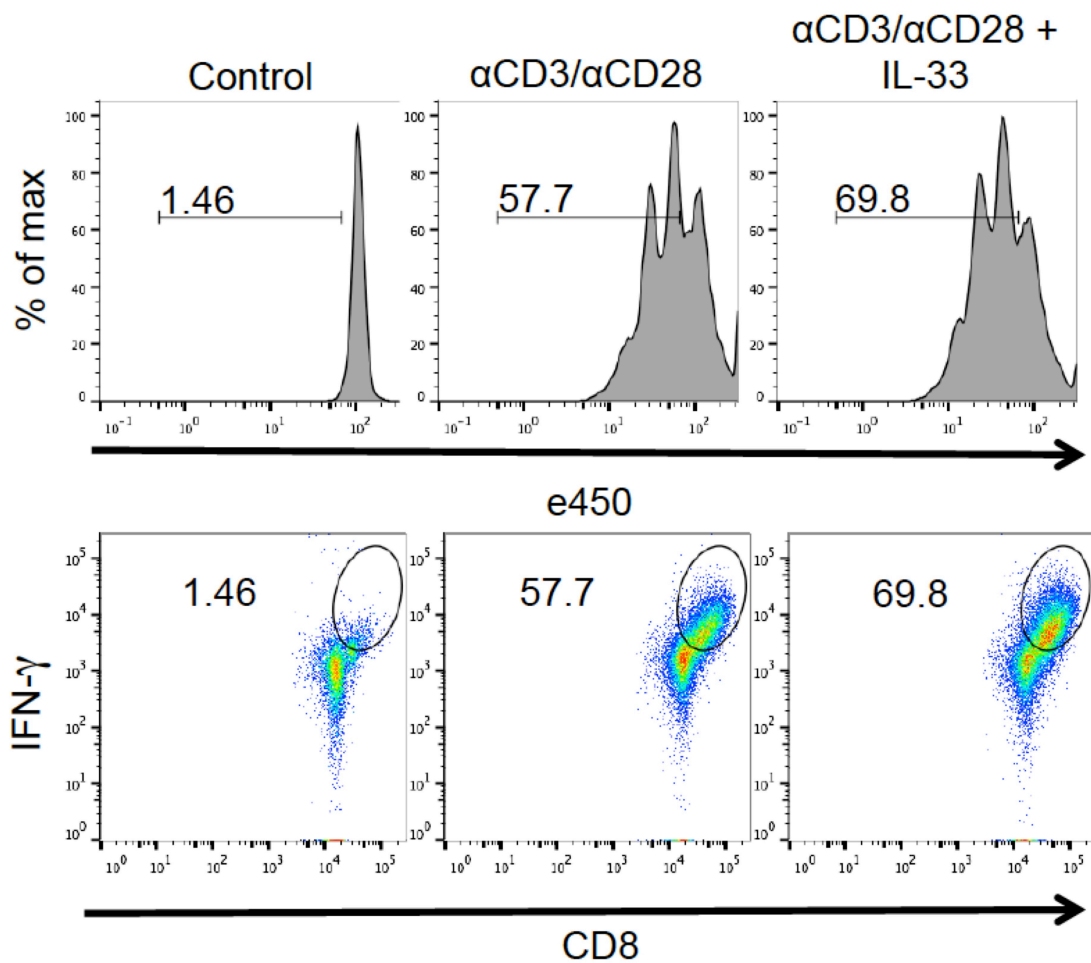

**Supplemental Figure 3. IL-33 has a direct action on CD8<sup>+</sup> T cells.** Naïve CD8<sup>+</sup> T cells labeled with proliferation dye eFluro450 were stimulated with anti-CD3 and anti-CD28 in the absence or presence of 10 ng/ml rIL-33. After 48 hours T cell proliferation was measured by e450 dilution, and IFN- $\gamma$  production was measured after restimulation with PMA and ionomycin by flow cytometry.

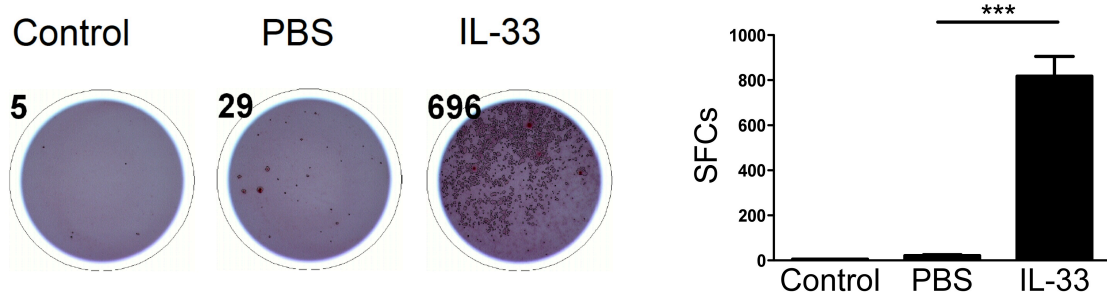

**Supplemental Figure 4. IL-33 activates DCs from tumor bearing mice to restore their T cell priming ability.** DCs from IL-33-treated B16-OVA-bearing mice have rescued cross presentation and priming ability compared to those from PBS-treated mice, quantified with an IFN- $\gamma$ -based ELISPOT assay. Splenic CD11c<sup>+</sup> cells from B16-OVA-bearing mice were cultured with naïve OT-1 CD8<sup>+</sup> T cells without addition of exogenous antigen at a 1:1 ratio for 48 hours. Representative ELISPOT panel shown on left (n=3). \*\*\*; p<0.001.
